# Supplementary material
Source: PubMed Central journal article supplement (PMC6542614)
Supplement: jciinsight-4-125052-s245.pdf [file jciinsight-4-125052-s245.pdf]

# Figure S1

## human *CNP* promoter

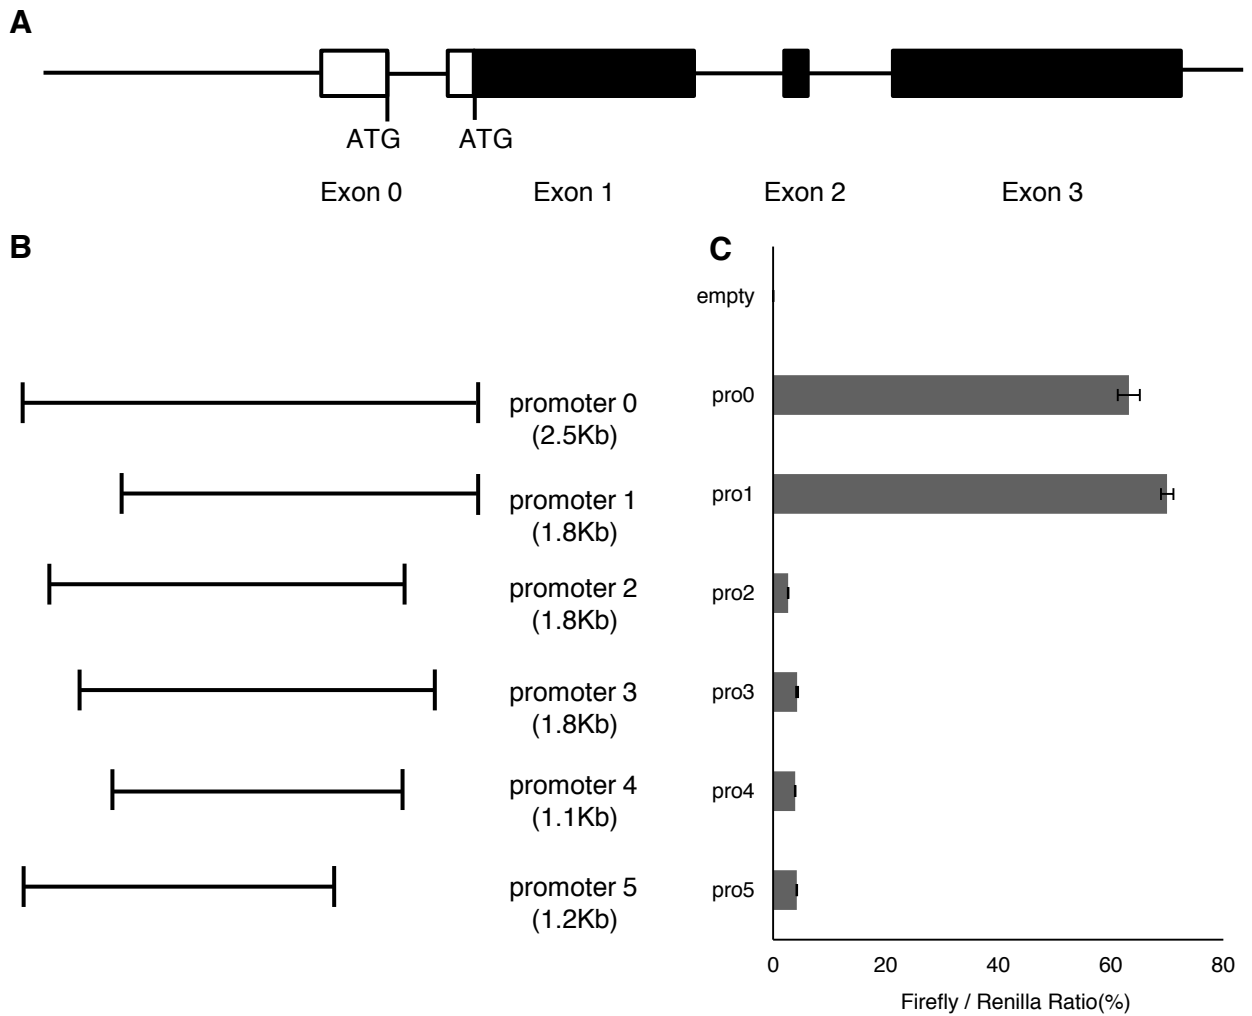

Figure S1 A schematic diagram of the human *CNP* gene (A) and six *CNP* promoter constructs (B). (C) The transcriptional activities of each promoter construct was evaluated using dual-luciferase reporter assay system (Promega, USA) in a oligodendroglial precursor cell line, Oli-neu cells (1). In this system, the expression of the firefly luciferase driven by each cloned human *CNP* promoter DNA fragment was correlated with a co-transfected control reporter expressing Renilla luciferase (2) in Oli-neu cells. The data are represented as the ratio of firefly to Renilla luciferase activity (Fluc/ Rluc%). Based on the efficient of transcriptional activity and the size of DNA fragment to fit in the scAAV vector, promoter 1 was selected to use in our study.

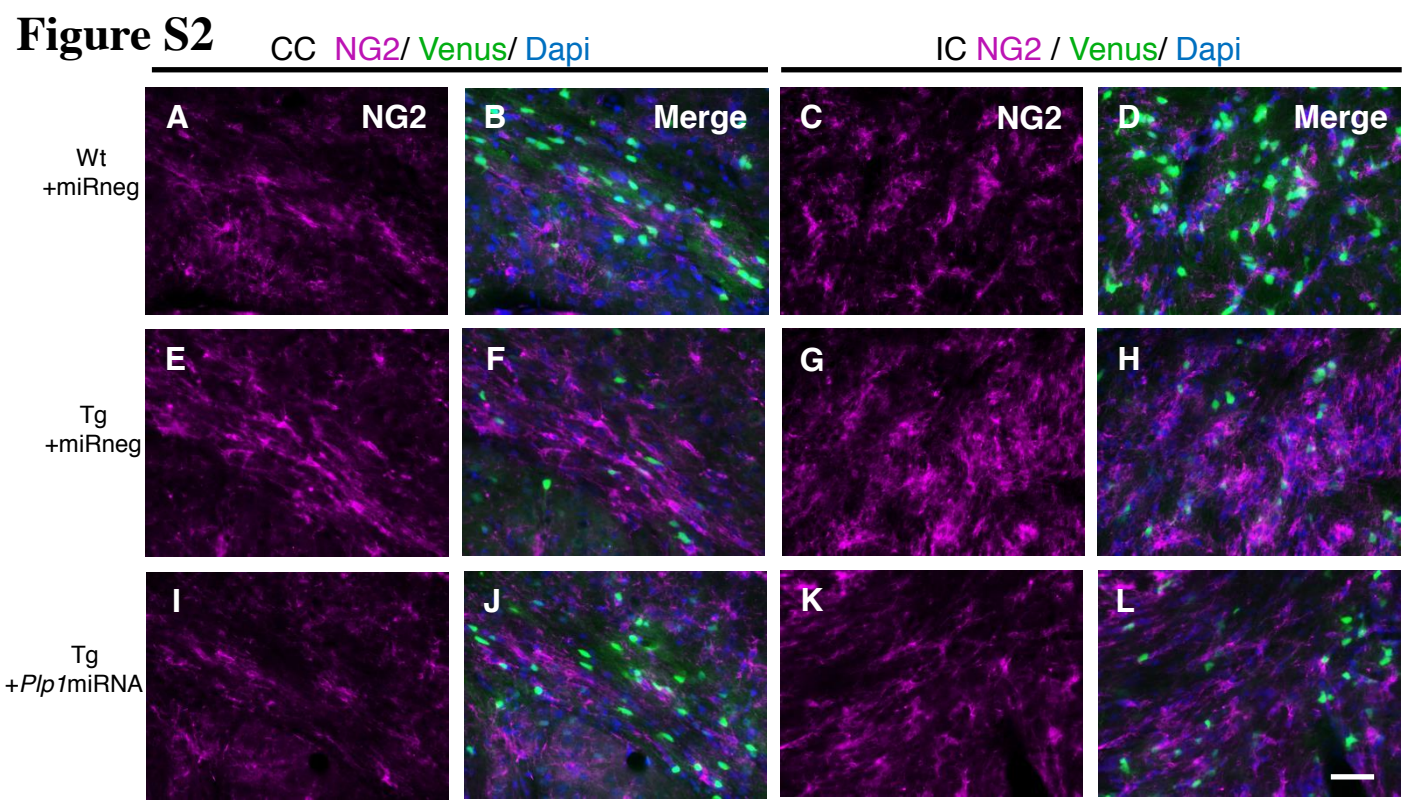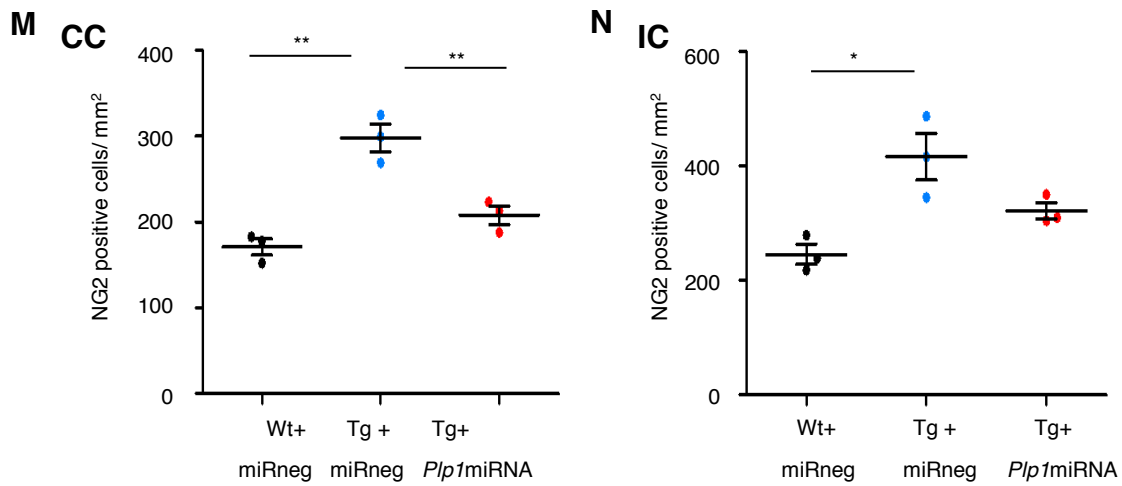

Figure S2. scAAV.CNP.Venus.Plp1miRNA treatment prevented the enhancement of proliferation of oligodendrocyte progenitor cells (OPCs) in *Plp1*-Tg mouse. Coronal sections of P25 mouse brains with an OPC marker NG2 immunostaining in CC (A-B, E-F, I-J) and IC (C-D, G-H, K-L) of Wt+miRneg mice (A-D), Tg+miRneg mice (E-H), and Tg+*Plp1*miRNA mice (I-L). Scale bar was 50 μm. Quantification of the densities of NG2 positive OPCs (n = 3 mice per group. Each value represents the average of cell densities obtained from 3 images.) in CC (M) and IC (N). Statistical significance was determined using One-way ANOVA with Bonferroni's post-test. \*P<0.05, \*\*P<0.01.

# Figure S3

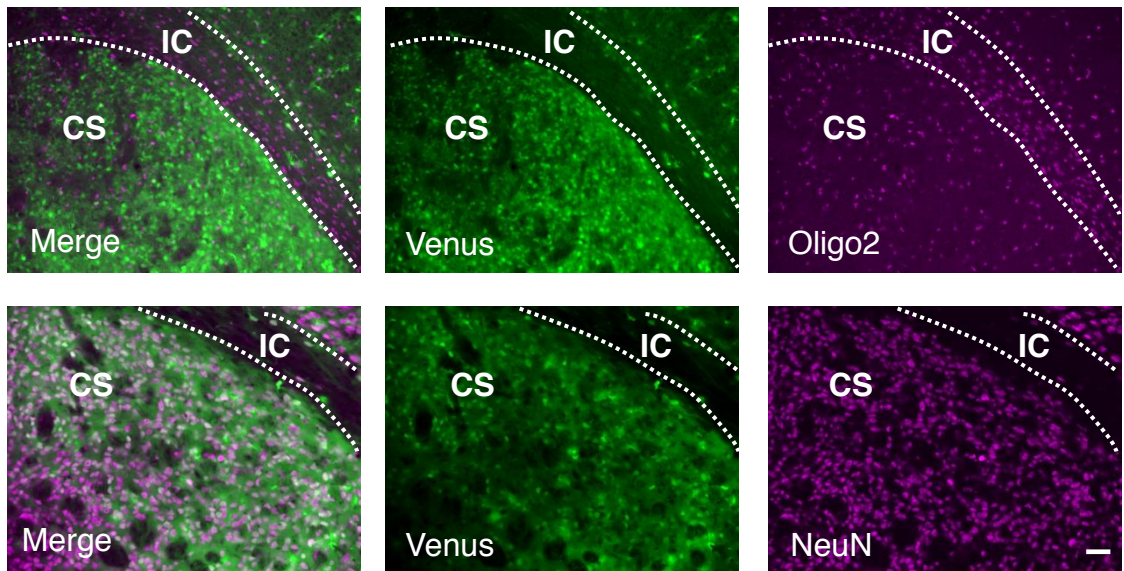

Figure S3 CAG promoter-driven scAAV barely express transgene in oligodendrocyte cells. One week prior to analysis,  $1.2 \times 10^9$  genome copies scAAV.CAG.Venus.miRneg was injected respectively into right CS and IC of P10 wild-type mice (n=5). Immunostaining of the coronal brain sections indicated that the AAV-derived Venus expression was rarely present in olig2-positive oligodendrocyte cells (upper row), but mainly present in NeuN-positive neurons (lower row). Scale bar=50 $\mu$ m.

# Figure S4

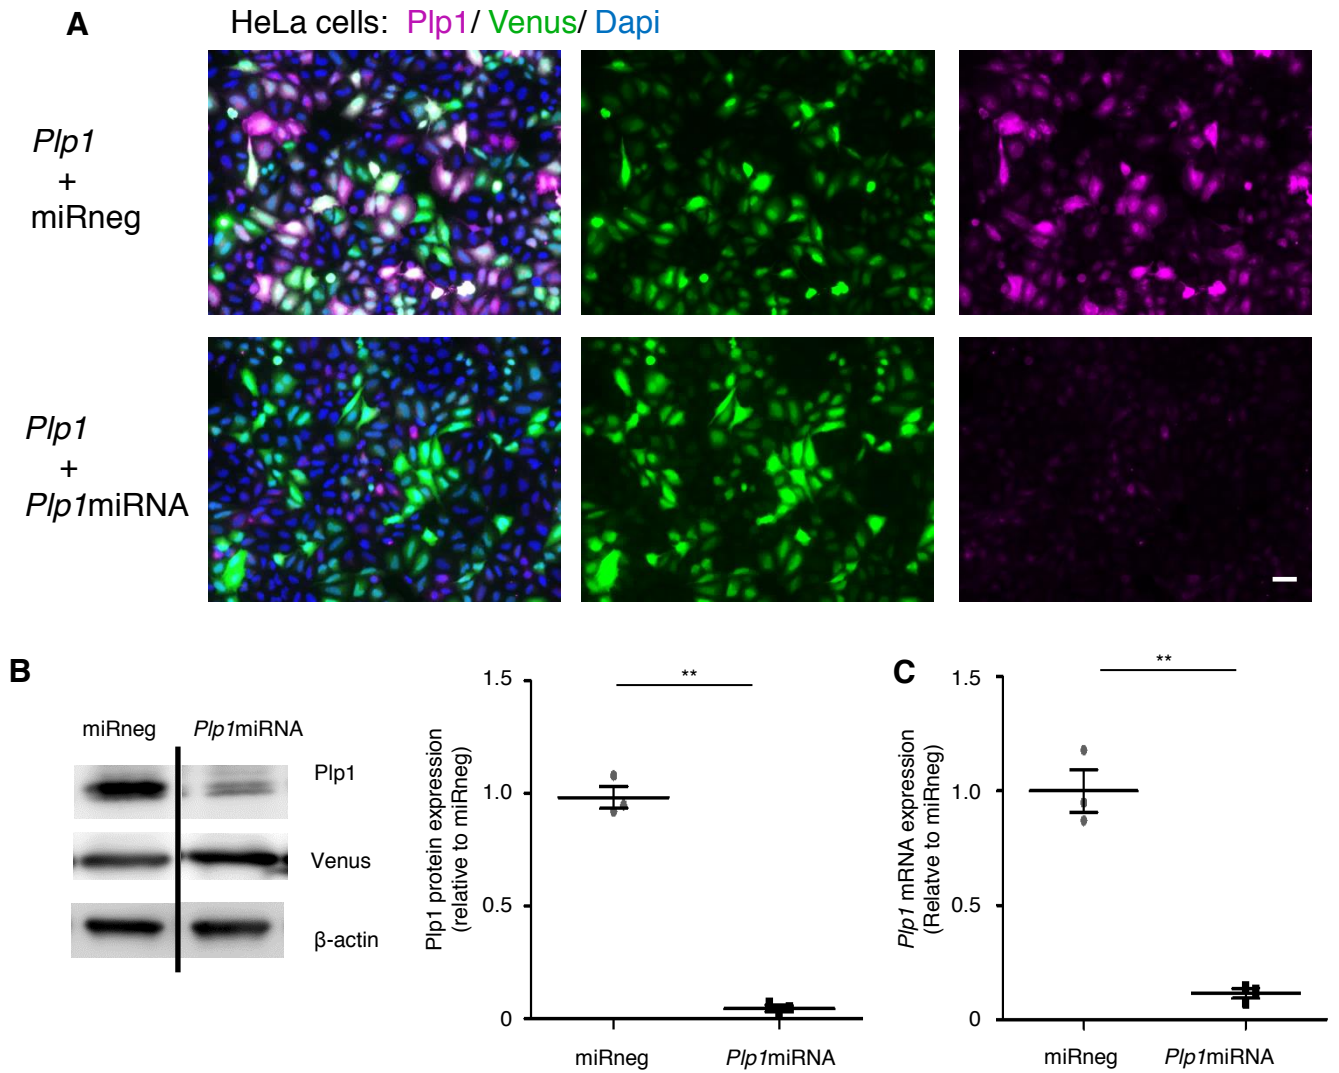

Figure S4 Artificial *Plp1* miRNA suppresses *Plp1* mRNA and protein expression *in vitro*. A mouse *Plp1* cDNA expression plasmid vector (pCAG-*Plp1*-Flag) (3) was co-transfecting with AAV backbone plasmid pscw.CAG.Venus.miRneg or pscw.CAG.Venus.*Plp1*miRNA in HeLa cells. 24 hours later, immunostaining was performed to detected Plp1 expression in Venus positive HeLa cells (A, Scale bar = 50 $\mu$ m). (B) The expression of Plp1 was detected by western blotting.  $\beta$ -actin was used as a control. The lanes were run on the same gel but were noncontiguous. Relative quantity of the Plp1 bands was shown in the right graph (data were obtained from 3 repeated experiments). (C) The expressions of *Plp1* mRNA were detected by quantitative RT-PCR (data were obtained from 3 repeated experiments). Statistical significant were determined using two tailed Student's t-test. \*\* $P < 0.01$ .

# Figure S5

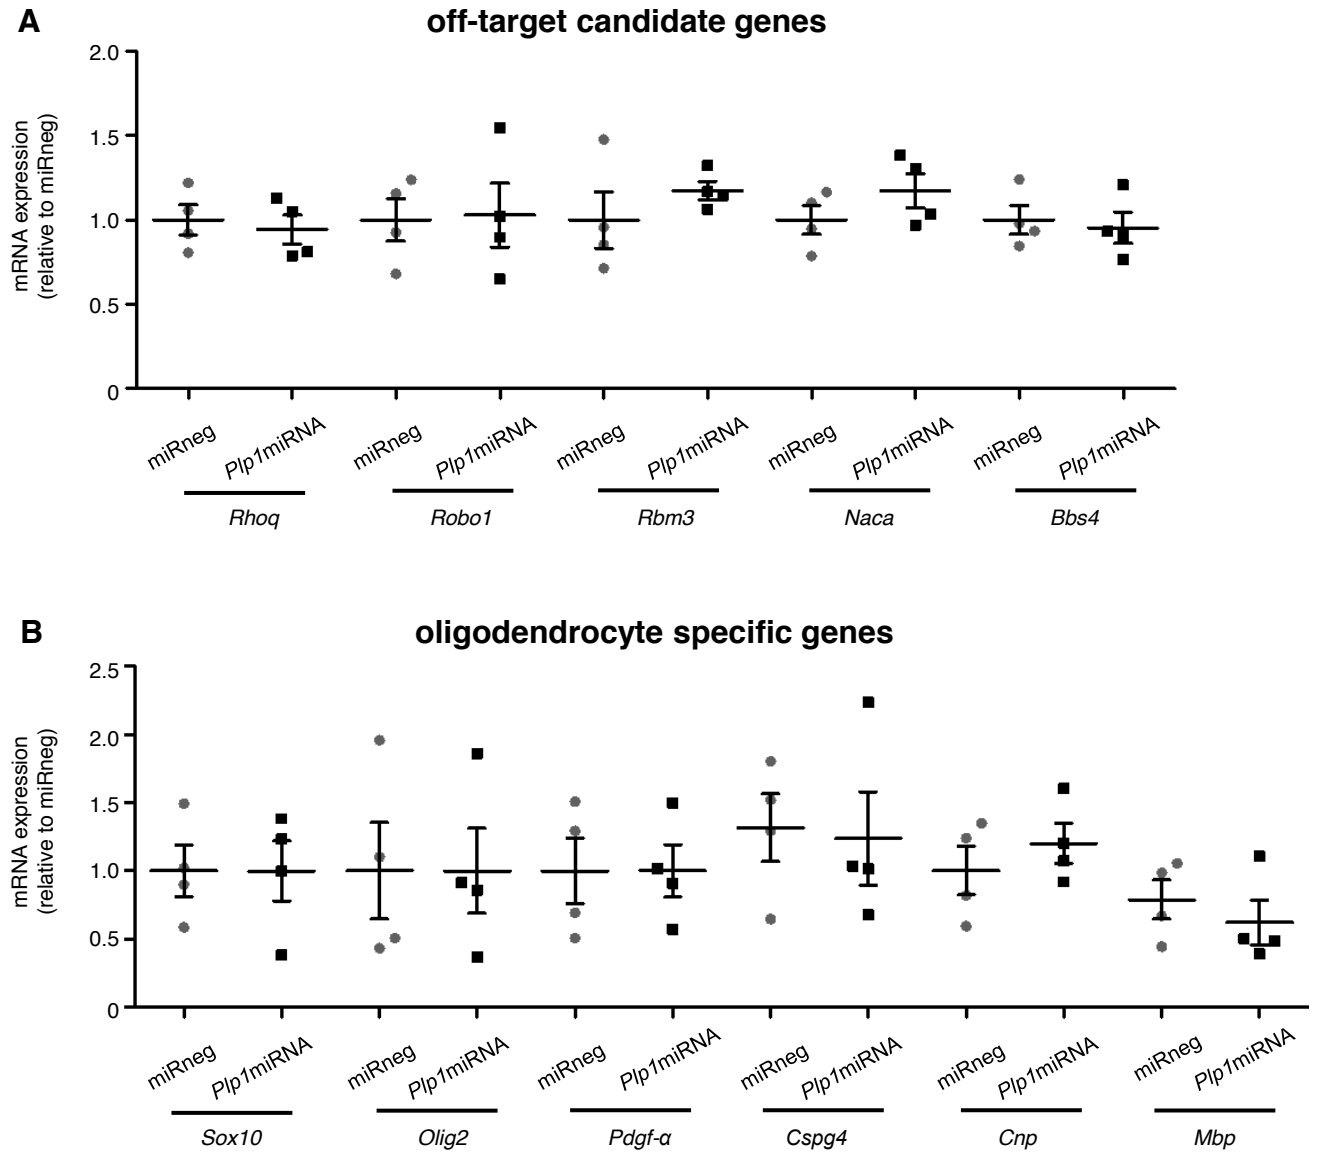

Figure S5 No significant changes in the mRNA level of off-target candidate genes (A) and oligodendrocyte specific genes (B) in response to the artificial *Plp1*miRNA. Venus-positive oligodendrocyte cells from wild-type mice treated with scAAV.CNP.Venus.miRneg (miRneg group) or scAAV.CNP.Venus.*Plp1*miRNA (*Plp1*miRNA group) were isolated by fluorescence-activated cell sorter (FACS). The values of black bars showed the mRNA expression of each gene in *Plp1*miRNA group relative to miRneg group (n=4 samples per group, in each sample, Venus-positive cells from 3 mice were pooled). Statistical significant were determined using two tailed Student's t-test.

# Figure S6

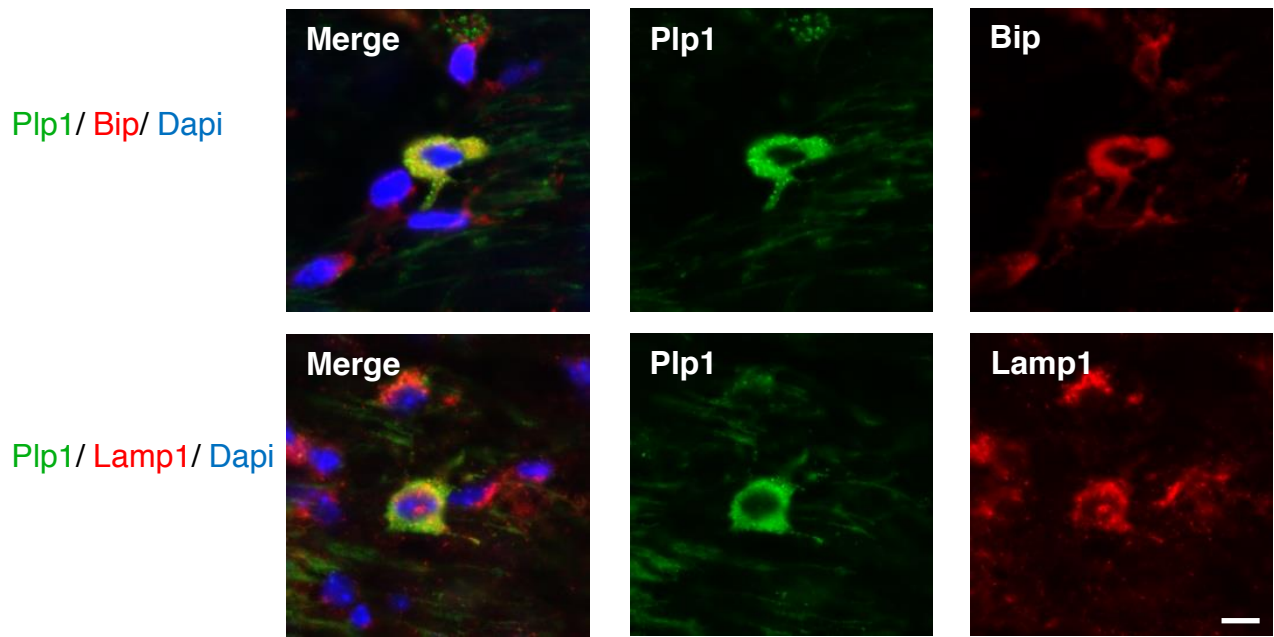

Figure S6 The intracellular localization of cytoplasmic accumulating Plp1 in *P1p1*-Tg mice (P25, corpus callosum) is detected by co-immunostaining with endoplasmic reticulum marker, Bip (upper row), and late endosomes/ lysosomes marker, Lamp1(lower row). Scale bar is 10µm.

# Figure S7

Plp1/ Dapi

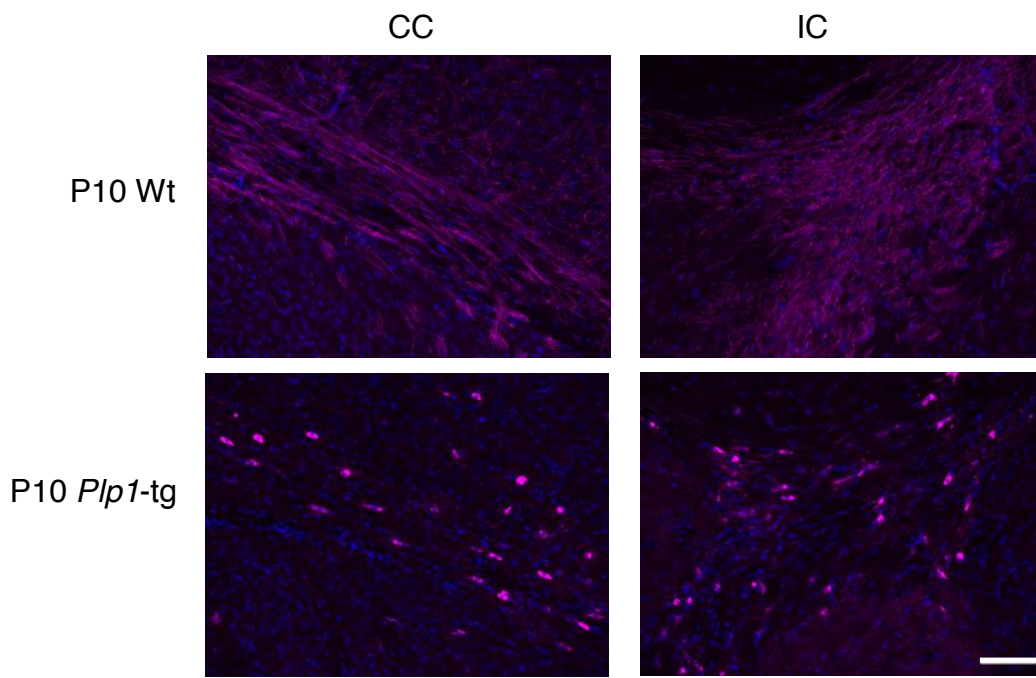

Figure S7 Cytoplasmic accumulation of Plp1 was already present in the oligodendrocytes of *Plp1*-Tg mice at postnatal day 10 (P10). Plp1 immunostaining was performed with the coronal brain sections at CC (left) and IC (right) of wild-type mice (upper row) and *Plp1*-tg mice (lower row). Scale bar is 100 $\mu$ m.

# Figure S8

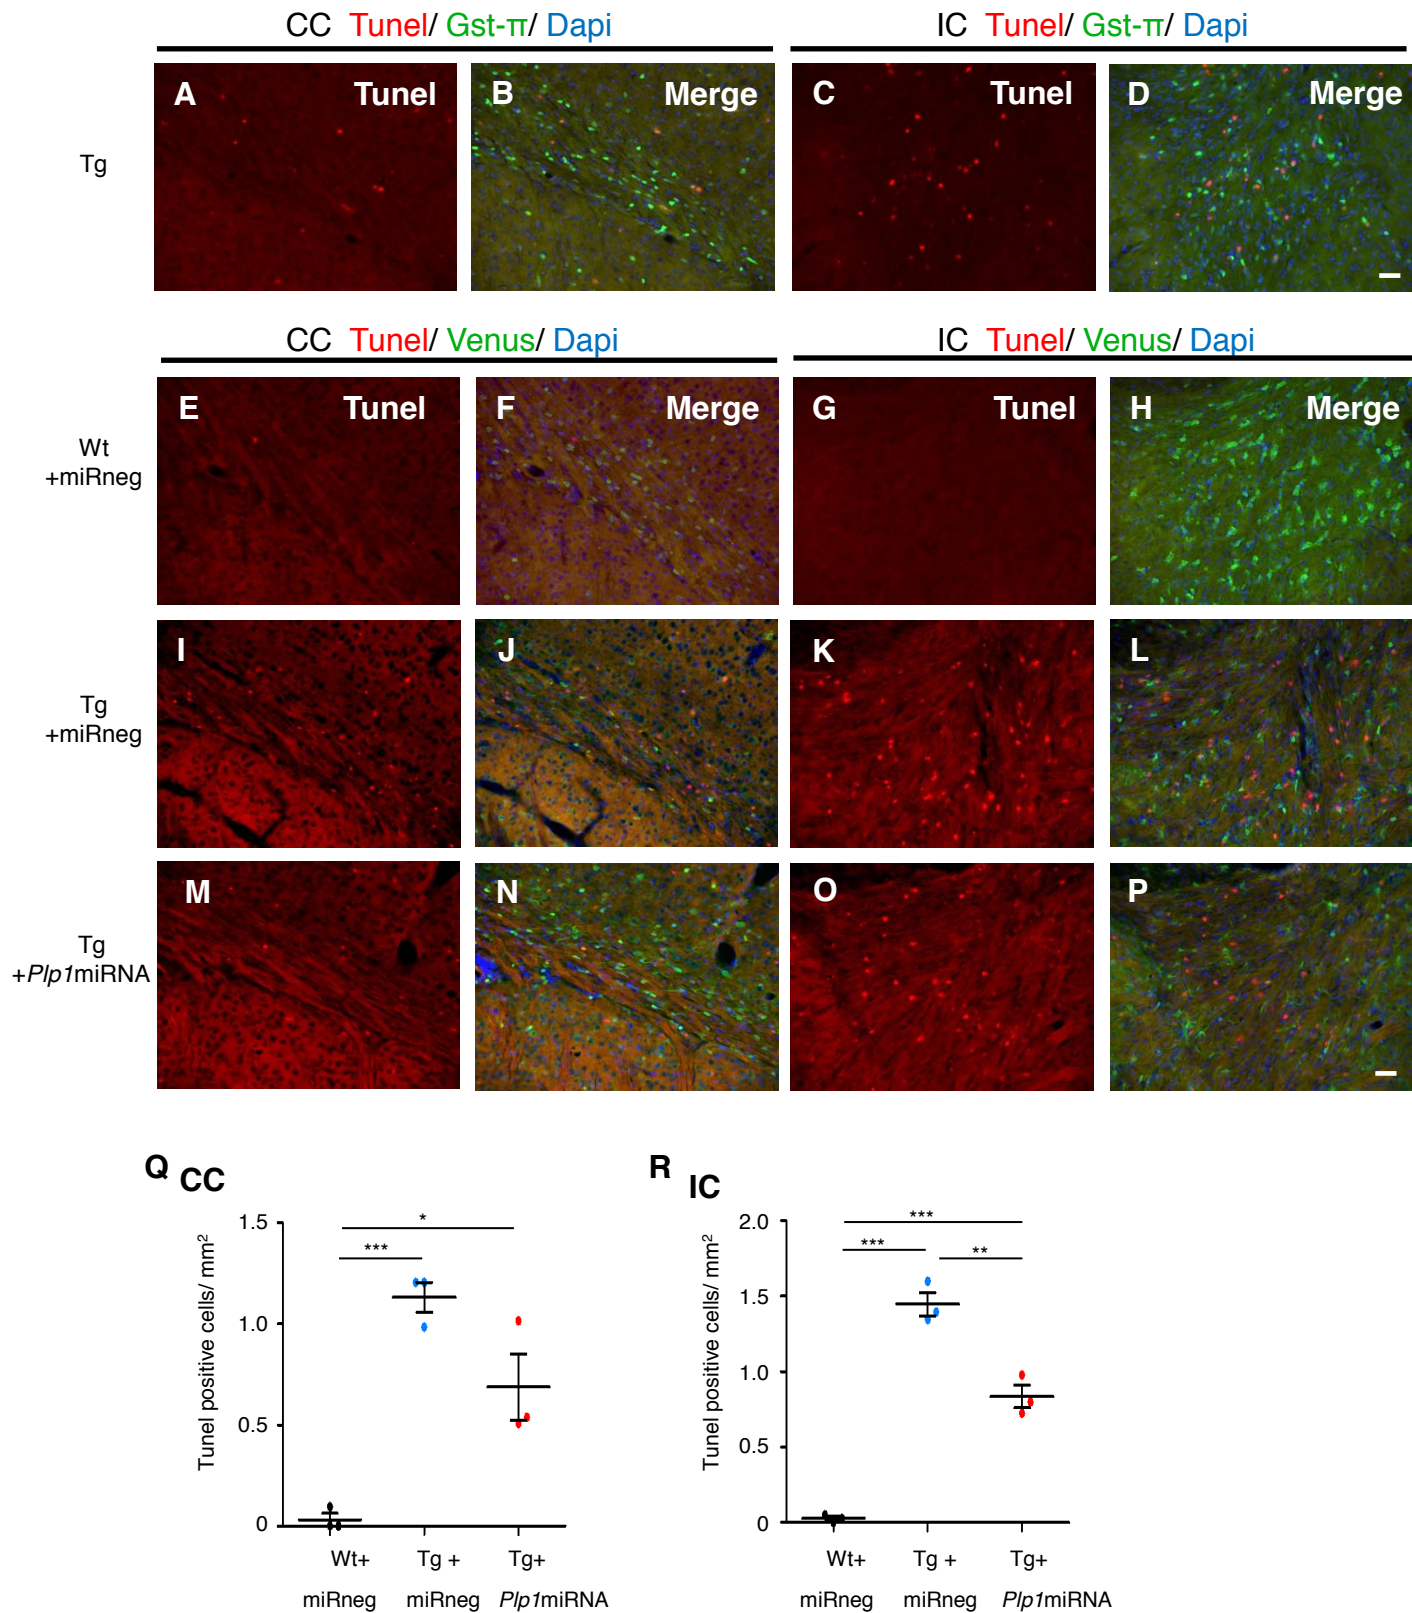

Figure S8. scAAV.CNP.Venus.Plp1miRNA treatment prevented the apoptosis of mature oligodendrocytes in *Plp1*-Tg mouse. Coronal sections of P25 *Plp1*-Tg mouse brains with a mature oligodendrocyte marker *Gst- $\pi$*  immunostaining and TUNEL assay in CC (A-B) and IC (C-D). TUNEL positive cells were mostly positive for *Gst- $\pi$* . TUNEL assays in CC (E-F, I-J, M-N) and IC (G-H, K-L, O-P) of Wt+miRneg mice (E-H), Tg+miRneg mice (I-L), and Tg+*Plp1*miRNA mice (M-P). Scale bar was 50  $\mu$ m. Quantification of the densities of TUNEL positive cells ( $n = 3$  mice per group). Each value represents the average of cell densities obtained from 3 images) in CC (Q) and IC (R). Statistical significance was determined using One-way ANOVA with Bonferroni's post-test. \* $P < 0.05$ , \*\* $P < 0.01$ , \*\*\* $P < 0.001$ .



**Table S1 Primers used in RT-qPCR and *CNP* promoter cloning**

| Gene                             | Primers (forward)                       | Primers (reverse)                       |
|----------------------------------|-----------------------------------------|-----------------------------------------|
| <i>Plp1</i>                      | GTTCCAGAGGCCAACATCAAGCTC                | AGCCATACAACAGTCAGGGCATAG                |
| <i>Sox10</i>                     | AACCTCATCCCTTGCCTAACT                   | TTGCCTCTGACTCTTTCCTG                    |
| <i>Olig2</i>                     | GGGAGGTCATGCCTTACGC                     | CTCCAGCGAGTTGGTGAGC                     |
| <i>Pdgfr-<math>\alpha</math></i> | CGTCTGGTCCTATGGCATTCTG                  | TCTCTTCTCGGGCTCACTGTTC                  |
| <i>Cspg4</i>                     | CTCTTGCTCCAGCTCCACTC                    | AGTGAGCACTACAGTGTGGG                    |
| <i>Cnpase</i>                    | GGAGATGAACCCAAGGAGAAGC                  | GGTGTCAAAAGAGAGCAGAGATGG                |
| <i>Mbp</i>                       | TCACACACGAGAACTACCCATT                  | TGGTGTTTCGAGGTGTCACAA                   |
| <i>Mog</i>                       | CCTGCTTCTTCAGAGACCACT                   | CGATGAGAGTCAGCACACCG                    |
| <i>Rhoq</i>                      | AGCAGTACCTCTTGGGACTC                    | AACGAGGCTGGATTTACCACG                   |
| <i>Robo1</i>                     | TGGCGACATGGGATCATAACA                   | TTACAACGAAATGTGGCGGC                    |
| <i>Rbm3</i>                      | CCCAGCTACATGGGCAAAC                     | GGAGCTGGTGCATAGGACT                     |
| <i>Naca</i>                      | TCTTTCTGCCGCCATCTTGG                    | GGCTGAAGACATAGGAAGCACA                  |
| <i>Bbs4</i>                      | CGGGAAACGGTCGGCTT                       | ACAGATGCAGGAACCTGAGTT                   |
| <i>Actb</i>                      | CACAGCTTCTTTGCAGCTCCTT                  | GACGACCAGCGCAGCGATA                     |
| <i>CNP</i><br>prompter           | GGCGGTACCACTAGTTAATGCAAA<br>AGTCCATGATG | GCTACGCGTGAATTCGGGAGAAGCCT<br>CTGTTCTGT |

## References

1. Söhl G, Hombach S, Degen J, and Odermatt B. The oligodendroglial precursor cell line Oli-neu represents a cell culture system to examine functional expression of the mouse gap junction gene connexin29 (Cx29). *Front Pharmacol.* 2013;4:83.
2. McNabb DS, Reed R, and Marciniak RA. Dual luciferase assay system for rapid assessment of gene expression in *Saccharomyces cerevisiae*. *Eukaryot Cell.* 2005;4(9):1539-49.
3. Yu LH, et al. Effect of curcumin in a mouse model of Pelizaeus-Merzbacher disease. *Mol Genet Metab.* 2012;106(1):108-14.
